# Supplementary material
Source: PubMed Central journal article supplement (PMC3832688)

Fig.s1. Detection EXO using a FACS method. Aldehyde/Sulfate latex beads (4  $\mu\text{m}$ ) were first coated with anti-CD81/63 antibodies, followed by blocking with glycine. The coated beads were incubated with either PBS (A) or 5  $\mu\text{g}$  of purified MIN6 EXO (B), and stained with anti-CD81-PE. (C) Latex beads were not coated with the anti-CD81/63 antibodies, but blocked with glycine before incubating with 5  $\mu\text{g}$  of purified MIN6 EXO, followed by staining with anti-CD81-PE.

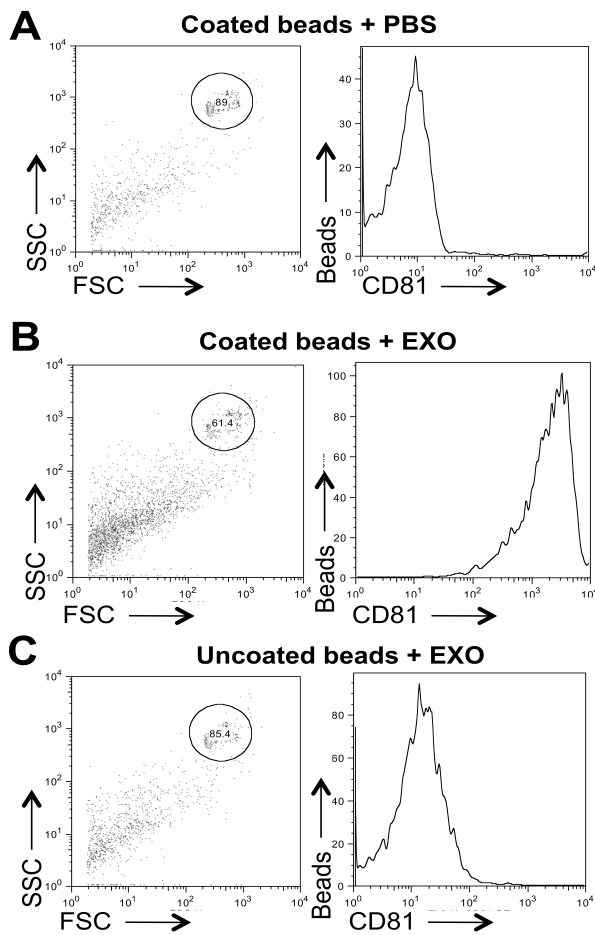

Supplement: NIHMS511007-supplement-Supplementary_Figure_1.pdf [file NIHMS511007-supplement-Supplementary_Figure_1.pdf]
